# Supplementary material for: A novel immunopeptidomic-based pipeline for the generation of personalized oncolytic cancer vaccines
Source: eLife journal article supplement (doi:10.7554/elife.71156), 2022-03-16

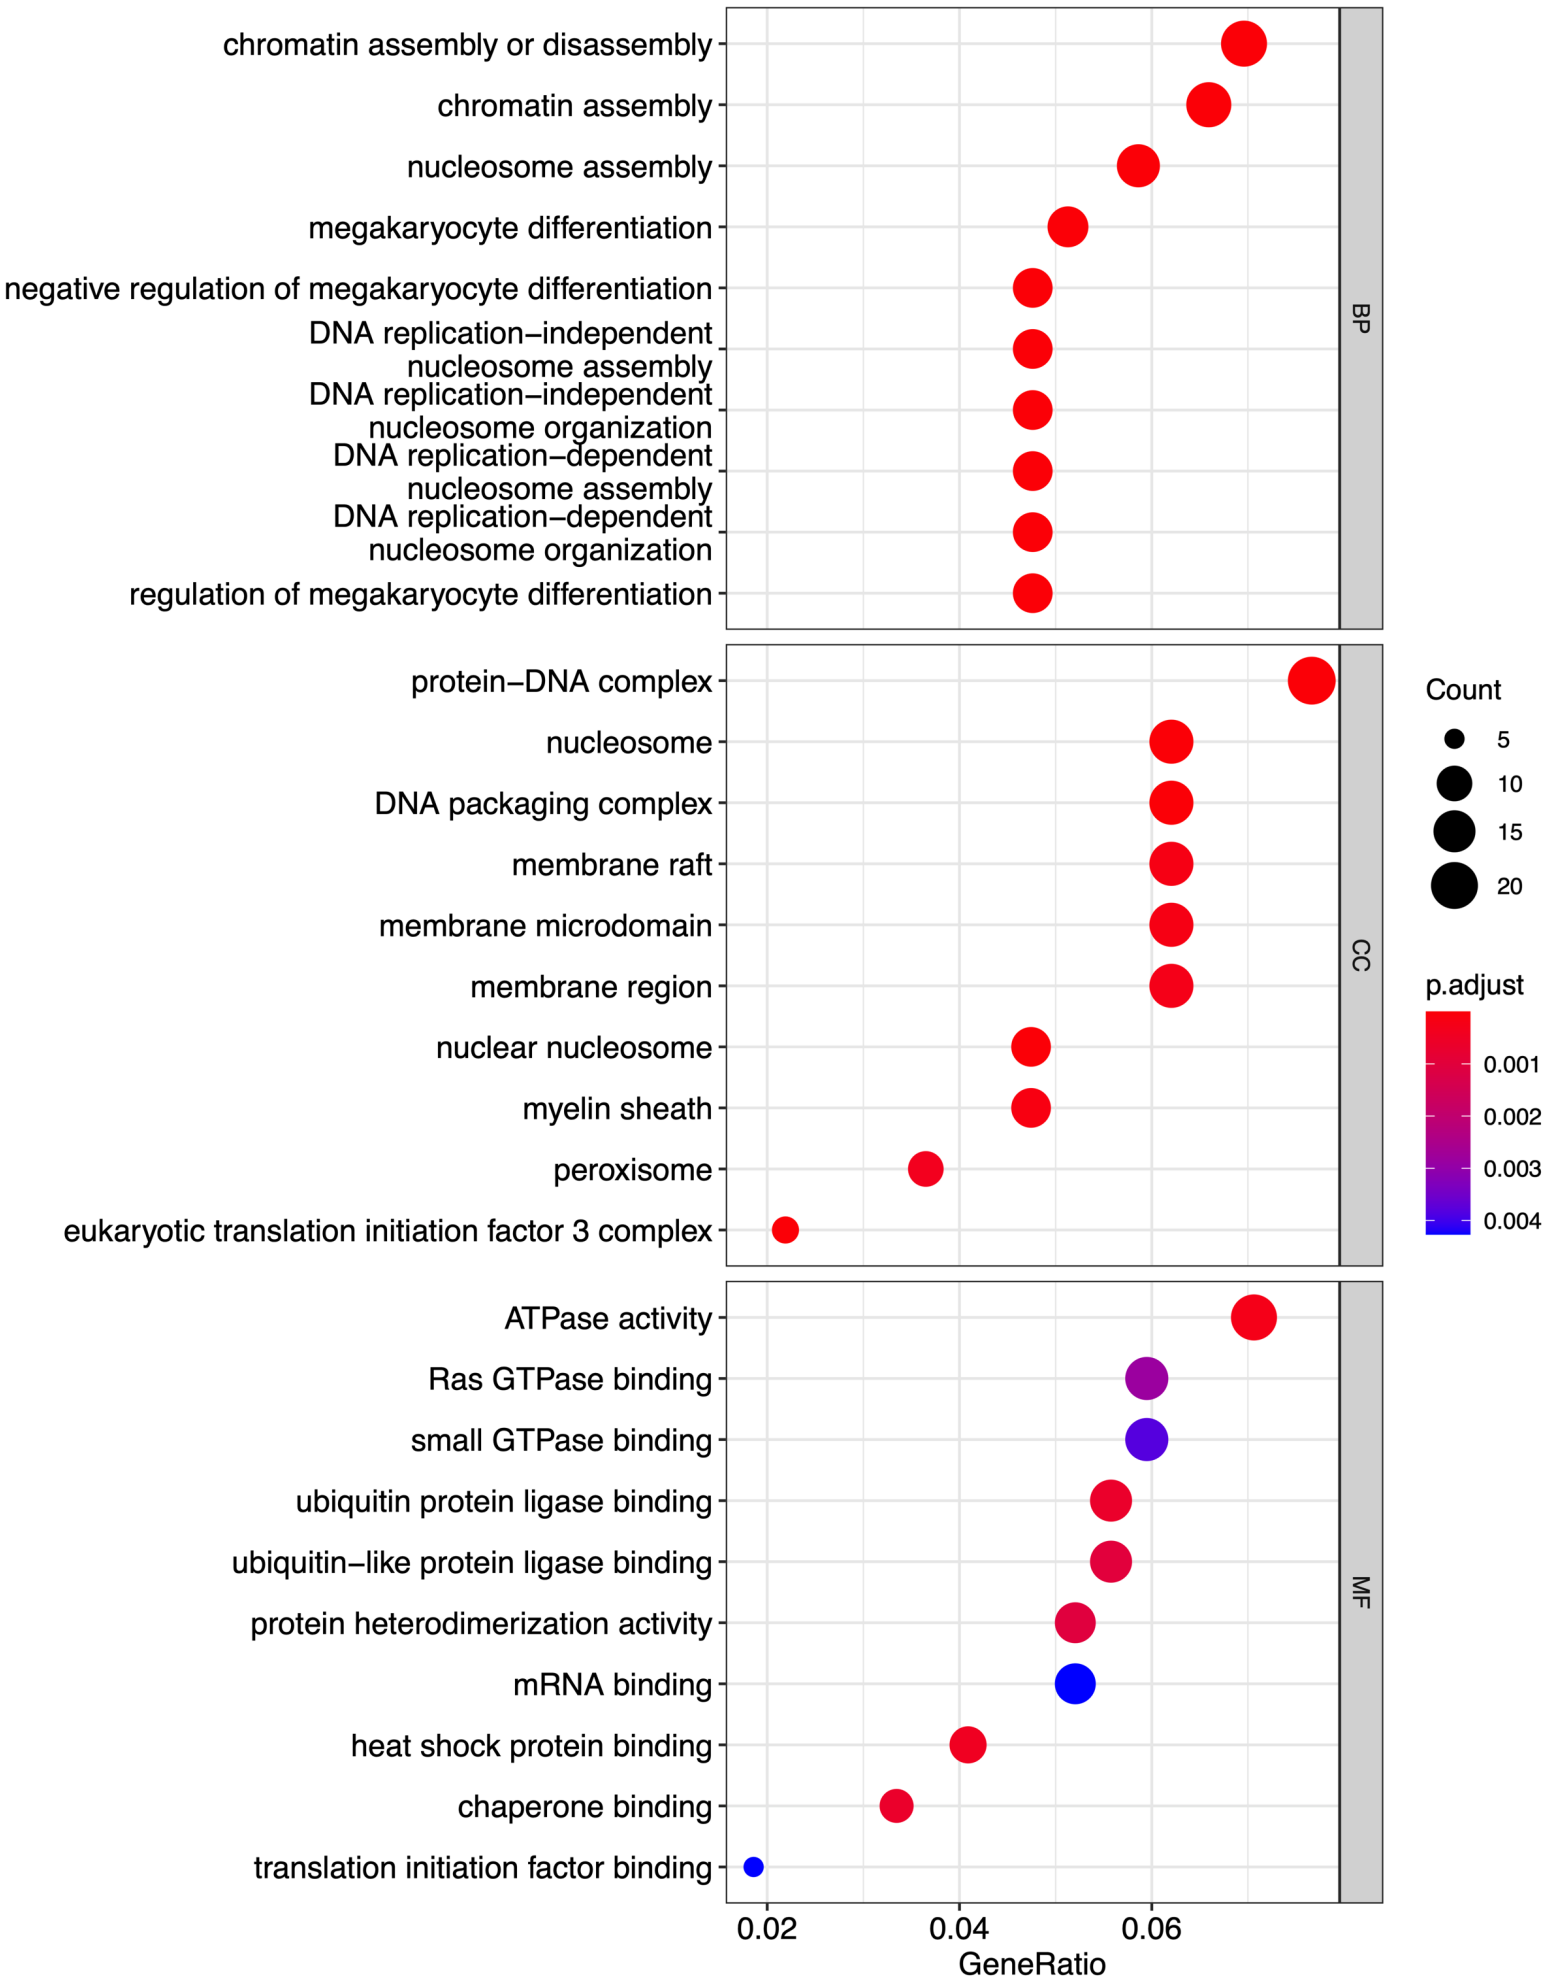

Supplement: supp [file elife-71156-supp-v1.zip]
